# Supplementary material for: Epidemiology of Norovirus Outbreaks Reported to the Public Health Emergency Event Surveillance System, China, 2014–2017
Source: MDPI journal article supplement (doi:10.3390/v11040342), 2019-04-11
Supplement: s1 [file s1]

**Table S1.** Size and duration of norovirus outbreaks reported to the Public Health Emergency Event Surveillance System (PHEESS), China, 2014–2017

| Year         | No. of Outbreaks |                | Total No. of Cases |                | No. of Reporting Provinces |                | Outbreak Size (cases), Median (IQR) <sup>1</sup> |                    | Outbreak Duration (days), Median (IQR) <sup>2</sup> |                       |
|--------------|------------------|----------------|--------------------|----------------|----------------------------|----------------|--------------------------------------------------|--------------------|-----------------------------------------------------|-----------------------|
|              | A <sup>3</sup>   | B <sup>4</sup> | A <sup>3</sup>     | B <sup>4</sup> | A <sup>3</sup>             | B <sup>4</sup> | A <sup>3</sup>                                   | B <sup>4</sup>     | A <sup>3</sup>                                      | B <sup>4</sup>        |
| 2014         | 53               | 5              | 4,599              | 73             | 10                         | 2              | 53 (29, 94)                                      | 13 (12, 18)        | 5.9 (2.8, 8.2)                                      | -                     |
| 2015         | 88               | 12             | 5,679              | 182            | 12                         | 5              | 42 (30, 69)                                      | 17 (12, 18)        | 6 (3.5, 8.4)                                        | 2.5 (1.5, 5.0)        |
| 2016         | 103              | 32             | 4,824              | 429            | 14                         | 5              | 38 (27, 60)                                      | 14 (10, 16)        | 4.9 (2.5, 9.8)                                      | 2 (1.2, 4.0)          |
| 2017         | 275              | 48             | 14,400             | 662            | 19                         | 12             | 40 (28, 65)                                      | 14 (12, 17)        | 5.5 (2.6, 9.8)                                      | 2.6 (1.5, 4.0)        |
| <b>Total</b> | <b>519</b>       | <b>97</b>      | <b>29,502</b>      | <b>1,346</b>   | <b>22</b>                  | <b>13</b>      | <b>40 (28, 66)</b>                               | <b>14 (12, 17)</b> | <b>5.7 (2.7, 9.3)</b>                               | <b>2.6 (1.3, 4.0)</b> |

<sup>1</sup> Outbreak size was significantly different between A and B by Mann-Whitney U test ( $p < 0.001$ ).

<sup>2</sup> Outbreak duration was significantly different between A and B by Mann-Whitney U test ( $p < 0.001$ ).

<sup>3</sup> For outbreaks involving  $\geq 20$  cases.

<sup>4</sup> For outbreaks involving  $< 20$  cases.

**Table S2.** Transmission mode and setting of norovirus outbreaks reported to the Public Health Emergency Event Surveillance System (PHEESS), China, 2014–2017

| Outbreak Characteristic   | No. of Outbreaks (%) |                | No. of Total Cases |                |
|---------------------------|----------------------|----------------|--------------------|----------------|
|                           | A <sup>1</sup>       | B <sup>2</sup> | A <sup>1</sup>     | B <sup>2</sup> |
| <b>Transmission Mode</b>  |                      |                |                    |                |
| Person-to-person          | 316 (60.9)           | 71 (73.2)      | 15,896             | 988            |
| Foodborne                 | 28 (5.4)             | 1 (1)          | 1,942              | 5              |
| Waterborne                | 19 (3.7)             | 2 (2.1)        | 1,580              | 36             |
| Multiple                  | 59 (11.4)            | 7 (7.2)        | 4,570              | 95             |
| Unknown                   | 97 (18.7)            | 16 (16.5)      | 5,514              | 222            |
| <b>Exposure Setting</b>   |                      |                |                    |                |
| Childcare facility        | 92 (17.7)            | 44 (45.4)      | 3042               | 597            |
| Primary school            | 199 (38.3)           | 40 (41.2)      | 9791               | 562            |
| Secondary school          | 115 (22.2)           | 6 (6.2)        | 7502               | 84             |
| University                | 39 (7.5)             | -              | 5081               | -              |
| Other school <sup>c</sup> | 30 (5.8)             | 6 (6.2)        | 1727               | 92             |
| Factory and institute     | 17 (3.3)             | -              | 799                | -              |
| Restaurant                | 6 (1.2)              | -              | 524                | -              |
| Private residence         | 11 (2.1)             | -              | 456                | -              |
| Hospital                  | 4 (0.8)              | -              | 297                | -              |
| Others                    | 6 (1.2)              | 1 (1)          | 283                | 11             |

<sup>1</sup> For outbreaks involving  $\geq 20$  cases.

<sup>2</sup> For outbreaks involving  $< 20$  cases.

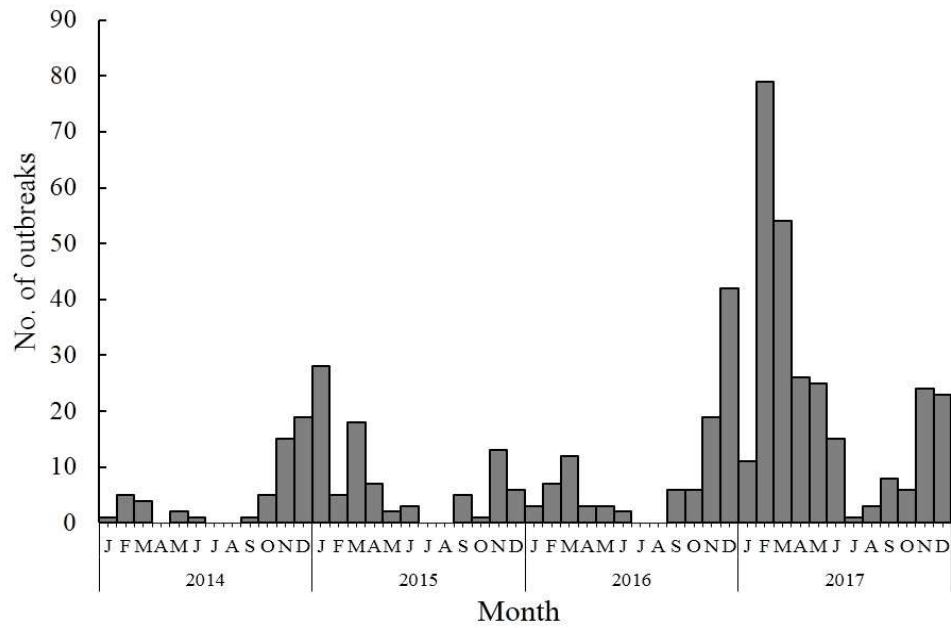

(A)

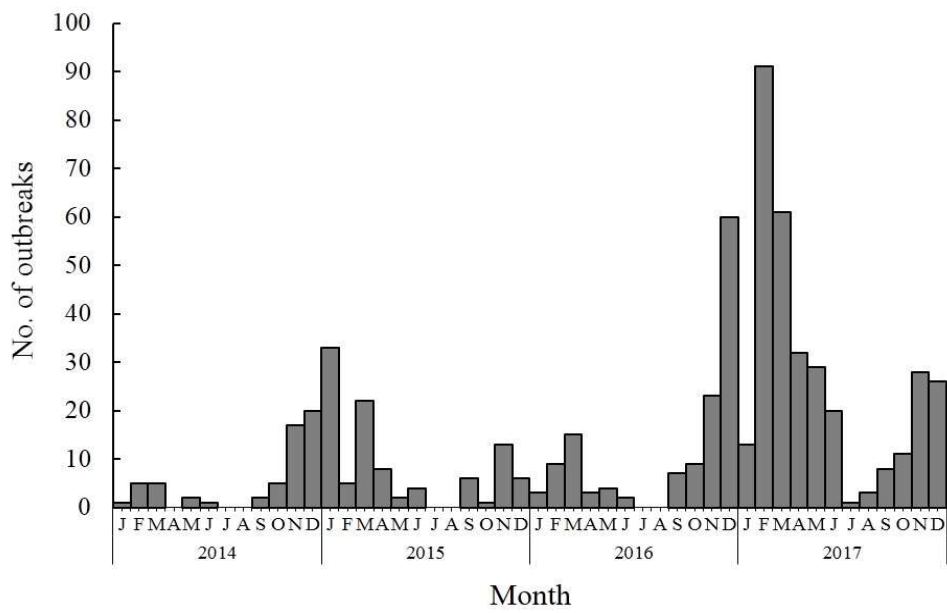

(B)

**Figure S1:** (A) Monthly distribution of norovirus outbreaks involving  $\geq 20$  cases reported to the Public Health Emergency Event Surveillance System (PHEESS), China, 2014–2017 ( $n = 519$ ). (B) Monthly distribution of norovirus outbreaks involving  $< 20$  cases reported to the Public Health Emergency Event Surveillance System (PHEESS), China, 2014–2017 ( $n = 97$ ).

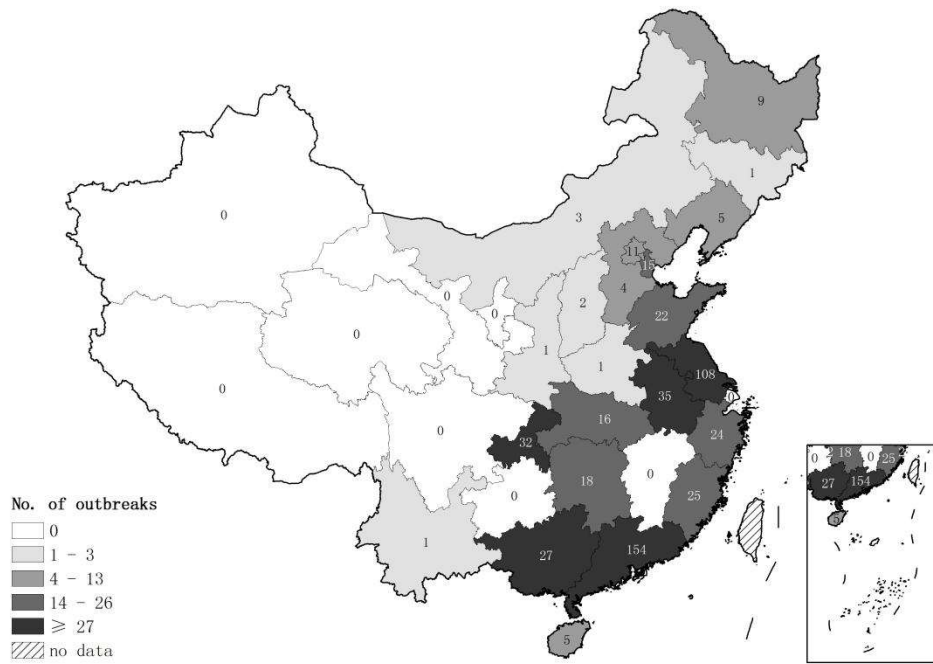

(A)

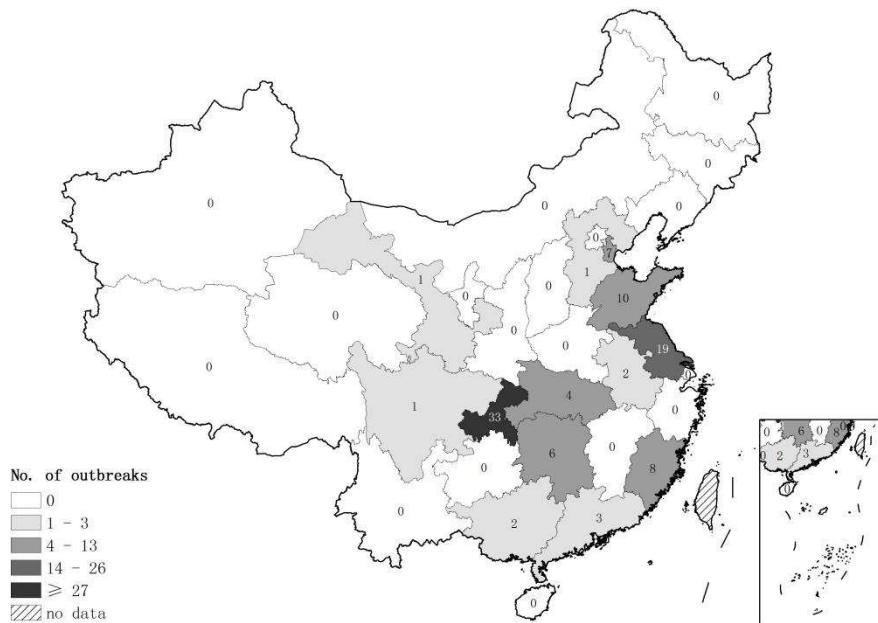

(B)

**Figure S2:** (A) Number of norovirus outbreaks involving  $\geq 20$  cases reported to the Public Health Emergency Event Surveillance System (PHEESS) by province, China, 2014–2017 ( $n = 519$ ). (B) Number of norovirus outbreaks involving  $< 20$  cases reported to the Public Health Emergency Event Surveillance System (PHEESS) by province, China, 2014–2017 ( $n = 97$ ).
